# Supplementary material
Source: ML conference proceedings conference paper supplement (https://openaccess.thecvf.com/content/CVPR_2019/html/Jeong_End-To-End_Efficient_Representation_CVPR_2019_paper.html)
Supplement: Supplementary file 1 [file Jeong_End-To-End_Efficient_Representation_CVPR_2019_supplemental.pdf]

# Supplementary material for CVPR 2019 paper #6535

Yeonwoo Jeong, Yoonsung Kim, Hyun Oh Song

Department of Computer Science and Engineering, Seoul National University, Seoul, Korea

{yeonwoo, yskim227, hyunoh}@mllab.snu.ac.kr

## A. Proofs for equivalence

### A.1 Recap for flow definition

$$\begin{aligned}
 (i) \quad & f_z(s, a_p) = k_s \\
 (ii) \quad & f_z(a_p, b_{r,q}) = \mathbf{z}_p[q] \\
 (iii) \quad & f_z((b_{r,q}, b_{0,q})_i) = \begin{cases} 1 & \forall i < \sum_{p: a_p \in A_r} \mathbf{z}_p[q] \\ 0 & \text{otherwise} \end{cases} \\
 (iv) \quad & f_z((b_{0,q}, t)_j) = \begin{cases} 1 & \forall j < \sum_{p=1}^{n_c} \mathbf{z}_p[q] \\ 0 & \text{otherwise} \end{cases} \quad (1)
 \end{aligned}$$

### A.2 Proofs for lemma1 and lemma2

**Lemma 1.** Given the minimum cost flow  $\{f_o(e)\}_{e \in E'}$  of the network  $G'$ , the total cost of the flow is  $\sum_{e \in E'} v(e) f_o(e) = \sum_{p=1}^{n_c} -\mathbf{c}_p^T \mathbf{z}'_p + \sum_{r=1}^l \sum_{p_1 \neq p_2 \in \{p | a_p \in A_r\}} \alpha \mathbf{z}'_{p_1}{}^T \mathbf{z}'_{p_2} + \sum_{p_1 \neq p_2} \beta \mathbf{z}'_{p_1}{}^T \mathbf{z}'_{p_2}$ .

*Proof.* The total minimum cost flow is

$$\begin{aligned}
 \sum_{e \in E'} v(e) f_o(e) &= \underbrace{\sum_{a_p \in A} v(s, a_p) f_o(s, a_p)}_{\text{Flow from source to vertices in } A} + \\
 &\underbrace{\sum_{r=0}^l \sum_{a_p \in A_r} \sum_{b_{r,q} \in B_r} v(a_p, b_{r,q}) f_o(a_p, b_{r,q})}_{\text{Flow from vertices in } A \text{ to vertices in } B_r} + \\
 &\underbrace{\sum_{r=1}^l \sum_{b_{r,q} \in B_r} \sum_{i=0}^{g_r-1} v((b_{r,q}, b_{0,q})_i) f_o((b_{r,q}, b_{0,q})_i)}_{\text{Flow from vertices in } B_r \text{ to vertices in } B_0} + \\
 &\underbrace{\sum_{b_{0,q} \in B_0} \sum_{j=0}^{n_c-1} v((b_{0,q}, t)_j) f_o((b_{0,q}, t)_j)}_{\text{Flow from vertices in } B_0 \text{ to sink}}
 \end{aligned}$$

Also, for  $r > 0$ , denote the amount of input flow at each vertex  $b_{r,q} \in B_r$  given the minimum cost flow as  $y'_{r,q} = \sum_{a_p \in A_r} f_o(a_p, b_{r,q}) = \sum_{p: a_p \in A_r} \mathbf{z}'_p[q]$ . Also, denote the amount of input flow at each vertex  $b_{0,q} \in B_0$  as  $y'_{0,q} = \sum_{p: a_p \in A_0} f_o(a_p, b_{0,q}) + \sum_{r=1}^l y'_{r,q} = \sum_{p=1}^{n_c} \mathbf{z}'_p[q]$ . Then, from the optimality of the minimum cost flow,

$$f_o((b_{r,q}, b_{0,q})_i) = \begin{cases} 1 & \forall i < y'_{r,q} \\ 0 & \text{otherwise} \end{cases} \quad \text{and} \quad f_o((b_{0,q}, t)_j) =$$

$\begin{cases} 1 & \forall j < y'_{0,q} \\ 0 & \text{otherwise} \end{cases}$ . Therefore, the total cost for optimal flow is

$$\begin{aligned}
 \sum_{e \in E'} v(e) f_o(e) &= 0 + \sum_{r=0}^l \sum_{a_p \in A_r} \sum_{b_{r,q} \in B_r} -\mathbf{c}_p[q] \mathbf{z}'_p[q] + \\
 &\sum_{r=1}^l \sum_{b_{r,q} \in B_r} \sum_{i=0}^{y'_{r,q}-1} 2\alpha i + \sum_{b_{0,q} \in B_0} \sum_{j=0}^{y'_{0,q}-1} 2\beta j \\
 &= \sum_p -\mathbf{c}_p^T \mathbf{z}'_p + \sum_{r=1}^l \sum_{b_{r,q} \in B_r} \alpha y'_{r,q} (y'_{r,q} - 1) + \sum_{b_{0,q} \in B_0} \beta y'_{0,q} (y'_{0,q} - 1) \\
 &= \sum_p -\mathbf{c}_p^T \mathbf{z}'_p + \sum_{r=1}^l \sum_{b_{r,q} \in B_r} \alpha y'_{r,q}{}^2 - \sum_{r=1}^l \sum_{p: a_p \in A_r} \sum_{q=1}^d \alpha \mathbf{z}'_p[q] + \\
 &\sum_{b_{0,q} \in B_0} \beta y'_{0,q}{}^2 - \sum_{p=1}^{n_c} \sum_{q=1}^d \beta \mathbf{z}'_p[q] \\
 &= \sum_p -\mathbf{c}_p^T \mathbf{z}'_p + \alpha \sum_{r=1}^l \sum_{p: a_p \in A_r} \mathbf{z}'_p{}^T \sum_{p: a_p \in A_r} \mathbf{z}'_p - \alpha \sum_{r=1}^l \sum_{p: a_p \in A_r} \mathbf{z}'_p{}^T \mathbf{z}'_p \\
 &\quad + \beta \sum_{p=1}^{n_c} \mathbf{z}'_p{}^T \sum_{p=1}^{n_c} \mathbf{z}'_p - \beta \sum_{p=1}^{n_c} \mathbf{z}'_p{}^T \mathbf{z}'_p \\
 &= \sum_{p=1}^{n_c} -\mathbf{c}_p^T \mathbf{z}'_p + \sum_{r=1}^l \sum_{p_1 \neq p_2 \in \{p | a_p \in A_r\}} \alpha \mathbf{z}'_{p_1}{}^T \mathbf{z}'_{p_2} + \sum_{p_1 \neq p_2} \beta \mathbf{z}'_{p_1}{}^T \mathbf{z}'_{p_2}.
 \end{aligned}$$

□

**Lemma 2.** Given a feasible flow  $\{f_z(e)\}_{e \in E'}$  of the network  $G'$ , the total cost of the flow is  $\sum_{e \in E'} v(e) f_z(e) = \sum_{p=1}^{n_c} -\mathbf{c}_p^T \mathbf{z}_p + \sum_{r=1}^l \sum_{p_1 \neq p_2 \in \{p | a_p \in A_r\}} \alpha \mathbf{z}_{p_1}{}^T \mathbf{z}_{p_2} + \sum_{p_1 \neq p_2} \beta \mathbf{z}_{p_1}{}^T \mathbf{z}_{p_2}$ .

*Proof.* The total cost proof is similar to Lemma 1 except that we use the flow conditions from Equation (1) (iii) and

Equation (1) (iv) instead of the optimality of the flow.

$$\begin{aligned}
\sum_{e \in E'} v(e) f_z(e) &= 0 + \sum_{r=0}^l \sum_{a_p \in A_r} \sum_{b_r, q \in B_r} -\mathbf{c}_p[q] \mathbf{z}_p[q] + \\
&\sum_{r=1}^l \sum_{b_r, q \in B_r} \sum_{i=0}^{y_{r,q}-1} 2\alpha i + \sum_{b_0, q \in B_0} \sum_{j=0}^{y_{0,q}-1} 2\beta j \\
&= \sum_p -\mathbf{c}_p^T \mathbf{z}_p + \sum_{r=1}^l \sum_{b_r, q \in B_r} \alpha y_{r,q} (y_{r,q} - 1) + \sum_{b_0, q \in B_0} \beta y_{0,q} (y_{0,q} - 1) \\
&= \sum_p -\mathbf{c}_p^T \mathbf{z}_p + \sum_{r=1}^l \sum_{b_r, q \in B_r} \alpha y_{r,q}^2 - \sum_{r=1}^l \sum_{p: a_p \in A_r} \sum_{q=1}^d \alpha \mathbf{z}_p[q] + \\
&\sum_{b_0, q \in B_0} \beta y_{0,q}^2 - \sum_{p=1}^{n_c} \sum_{q=1}^d \beta \mathbf{z}_p[q] \\
&= \sum_p -\mathbf{c}_p^T \mathbf{z}_p + \alpha \sum_{r=1}^l \sum_{p: a_p \in A_r} \mathbf{z}_p^T \sum_{p: a_p \in A_r} \mathbf{z}_p - \alpha \sum_{r=1}^l \sum_{p: a_p \in A_r} \mathbf{z}_p^T \mathbf{z}_p \\
&\quad + \beta \sum_{p=1}^{n_c} \mathbf{z}_p^T \sum_{p=1}^{n_c} \mathbf{z}_p - \beta \sum_{p=1}^{n_c} \mathbf{z}_p^T \mathbf{z}_p \\
&= \sum_{p=1}^{n_c} -\mathbf{c}_p^T \mathbf{z}_p + \sum_{r=1}^l \sum_{p_1 \neq p_2 \in \{p | a_p \in A_r\}} \alpha \mathbf{z}_{p_1}^T \mathbf{z}_{p_2} + \sum_{p_1 \neq p_2} \beta \mathbf{z}_{p_1}^T \mathbf{z}_{p_2}
\end{aligned}$$

□

## B. Time complexity

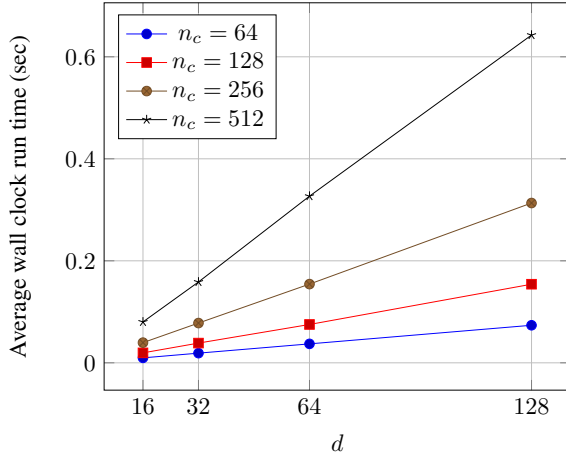

Figure 1: Average wall clock run time of computing minimum cost flow on  $G'$  per mini-batch using [2]. In practice, the run time is approximately linear in  $n_c$  and  $d$ . Each data point is averaged over 20 runs on machines with Intel Xeon E5-2650 CPU.

## C. Effect of label remapping

We performed the ablation study without the label remapping method. ‘Ours-r’ in Table 1 and Table 2 shows the results without the remapping. The ablation study shows that the proposed hierarchical structure leads to much larger improvements than the remapping method.

| $k_s$ | Method | test          |              |              |              | train         |              |              |              |
|-------|--------|---------------|--------------|--------------|--------------|---------------|--------------|--------------|--------------|
|       |        | SUF           | Pr@1         | Pr@4         | Pr@16        | SUF           | Pr@1         | Pr@4         | Pr@16        |
| 1     | LSH    | <b>138.83</b> | 52.52        | 48.67        | 39.71        | <b>135.64</b> | 60.45        | 58.10        | 54.00        |
|       | Th     | 41.21         | 54.82        | 52.88        | 48.03        | 43.19         | 61.56        | 60.24        | 58.23        |
|       | VQ     | 22.78         | 56.74        | 55.94        | 53.77        | 40.35         | 62.54        | 61.78        | 60.98        |
|       | [1]    | 97.67         | 57.63        | 57.16        | 55.76        | 97.77         | 63.85        | 63.40        | 63.39        |
|       | Ours-r | 98.12         | 58.16        | 57.39        | 56.01        | 98.45         | 64.38        | 63.94        | 63.86        |
|       | Ours   | 97.67         | <b>58.42</b> | <b>57.88</b> | <b>56.58</b> | 97.28         | <b>64.73</b> | <b>64.63</b> | <b>64.69</b> |
| 2     | Th     | 14.82         | 56.55        | 55.62        | 52.90        | 15.34         | 62.41        | 61.68        | 60.89        |
|       | VQ     | 5.63          | 56.78        | 56.00        | 53.99        | 6.94          | 62.66        | 61.92        | 61.26        |
|       | [1]    | 76.12         | 57.30        | 56.70        | 55.19        | 78.28         | 63.60        | 63.19        | 63.09        |
|       | Ours-r | <b>101.26</b> | 58.18        | <b>57.68</b> | <b>56.43</b> | <b>100.29</b> | <b>65.00</b> | <b>64.52</b> | <b>64.42</b> |
|       | Ours   | 98.38         | <b>58.39</b> | 57.51        | 56.09        | 97.20         | 64.35        | 63.91        | 63.81        |
| 3     | Th     | 7.84          | 56.78        | 55.91        | 53.64        | 8.04          | 62.66        | 61.88        | 61.16        |
|       | VQ     | 2.83          | 56.78        | 55.99        | 53.95        | 2.96          | 62.62        | 61.92        | 61.22        |
|       | [1]    | 42.12         | 56.97        | 56.25        | 54.40        | 44.36         | 62.87        | 62.22        | 61.84        |
|       | Ours-r | <b>97.78</b>  | 57.58        | 57.14        | 55.70        | <b>97.25</b>  | <b>63.95</b> | <b>63.58</b> | <b>63.48</b> |
|       | Ours   | 94.55         | <b>58.19</b> | <b>57.42</b> | <b>56.02</b> | 93.69         | 63.60        | 63.35        | 63.32        |
| 4     | Th     | 4.90          | 56.84        | 56.01        | 53.86        | 5.00          | 62.66        | 61.94        | 61.24        |
|       | VQ     | 1.91          | 56.77        | 55.99        | 53.94        | 1.97          | 62.62        | 61.91        | 61.22        |
|       | [1]    | 16.19         | 57.11        | 56.21        | 54.20        | 16.52         | 62.81        | 62.14        | 61.58        |
|       | Ours-r | <b>98.36</b>  | 57.58        | 57.18        | 55.94        | <b>97.88</b>  | 63.90        | 63.32        | 63.25        |
|       | Ours   | 92.18         | <b>58.52</b> | <b>57.79</b> | <b>56.22</b> | 91.27         | <b>64.20</b> | <b>63.95</b> | <b>63.63</b> |

Table 1: Results with Triplet network with hard negative mining. Querying test data against a hash table built on *test* set and a hash table built on *train* set on Cifar-100.

| $k_s$ | Method | test         |              |              |              | train        |              |              |              |
|-------|--------|--------------|--------------|--------------|--------------|--------------|--------------|--------------|--------------|
|       |        | SUF          | Pr@1         | Pr@4         | Pr@16        | SUF          | Pr@1         | Pr@4         | Pr@16        |
| 1     | LSH    | 29.74        | 53.55        | 50.75        | 43.03        | 30.75        | 59.87        | 58.34        | 55.35        |
|       | Th     | 12.72        | 54.95        | 52.60        | 47.16        | 13.65        | 60.80        | 59.49        | 57.27        |
|       | VQ     | 34.86        | 56.76        | 55.35        | 53.75        | 31.35        | 61.22        | 60.24        | 59.34        |
|       | [1]    | 54.85        | 58.19        | 57.22        | 55.87        | 54.90        | <b>63.11</b> | 62.29        | 61.94        |
|       | Ours-r | 95.30        | 58.04        | 57.31        | 56.22        | 90.63        | 62.55        | 62.15        | 61.77        |
|       | Ours   | <b>101.1</b> | <b>58.28</b> | <b>57.79</b> | <b>56.92</b> | <b>97.47</b> | 63.06        | <b>62.62</b> | <b>62.44</b> |
| 2     | Th     | 5.09         | 56.52        | 55.28        | 53.04        | 5.36         | 61.65        | 60.50        | 59.50        |
|       | VQ     | 6.08         | 57.13        | 55.74        | 53.90        | 5.44         | 61.82        | 60.56        | 59.70        |
|       | [1]    | 16.20        | 57.27        | 55.98        | 54.42        | 16.51        | 61.98        | 60.93        | 60.15        |
|       | Ours-r | 66.74        | 57.73        | 57.01        | 55.66        | 67.46        | 62.76        | 61.87        | 61.36        |
|       | Ours   | <b>69.48</b> | <b>57.60</b> | <b>56.98</b> | <b>55.82</b> | <b>69.91</b> | <b>62.19</b> | <b>61.71</b> | <b>61.27</b> |
| 3     | Th     | 3.10         | 56.97        | 55.56        | 53.76        | 3.21         | 61.75        | 60.66        | 59.73        |
|       | VQ     | 2.66         | 57.01        | 55.69        | 53.90        | 2.36         | 61.78        | 60.62        | 59.73        |
|       | [1]    | 7.25         | 57.15        | 55.81        | 54.10        | 7.32         | 61.90        | 60.80        | 59.96        |
|       | Ours-r | 55.83        | <b>57.81</b> | 56.55        | 55.11        | 57.11        | 62.20        | <b>61.50</b> | 60.90        |
|       | Ours   | <b>57.09</b> | 57.56        | <b>56.70</b> | <b>55.41</b> | <b>58.62</b> | <b>62.30</b> | 61.44        | <b>60.91</b> |
| 4     | Th     | 2.25         | 57.02        | 55.64        | 53.88        | 2.30         | 61.78        | 60.66        | 59.75        |
|       | VQ     | 1.66         | 57.03        | 55.70        | 53.91        | 1.55         | 61.78        | 60.62        | 59.73        |
|       | [1]    | 4.51         | 57.15        | 55.77        | 54.01        | 4.52         | 61.81        | 60.69        | 59.77        |
|       | Ours-r | 48.04        | <b>57.76</b> | 56.70        | 55.11        | 49.73        | 62.12        | 61.30        | 60.74        |
|       | Ours   | <b>49.43</b> | 57.75        | <b>56.79</b> | <b>55.50</b> | <b>50.80</b> | <b>62.43</b> | <b>61.65</b> | <b>61.01</b> |

Table 2: Results with Npairs [4] network. Querying test data against a hash table built on *test* set and a hash table built on *train* set on Cifar-100.

## D. ImagenetSplit Detail

Table 3 shows the  $C_{\text{train}}$  and  $C_{\text{test}}$  explicitly.

| <i>train</i>                                                    | <i>test</i>                                                                         |
|-----------------------------------------------------------------|-------------------------------------------------------------------------------------|
| tench,electric ray,cock,jay                                     | goldfish,stingray,hen,magpie                                                        |
| common newt,spotted salamander,tree frog,loggerhead             | eft,axolotl,tailed frog,leatherback turtle                                          |
| common iguana,agama,diamondback,trilobite                       | American chameleon,frilled lizard,sidewinder,centipede                              |
| harvestman,quail,African grey,bee eater                         | scorpion,partridge,macaw,hornbill                                                   |
| jacamar,echidna,flatworm,crayfish                               | toucan,platypus,nematode,hermit crab                                                |
| white stork,little blue heron,red-backed sandpiper,Walker hound | black stork,bittern,redshank,English foxhound                                       |
| Irish wolfhound,whippet,Staffordshire bullterrier,vizsla        | borzoi,Italian greyhound,American Staffordshire terrier,German short-haired pointer |
| English springer,schipperke,malinois,Siberian husky             | Welsh springer spaniel,kuvasz,groenendael,malamute                                  |
| Cardigan,cougar,meerkat,dung beetle                             | Pembroke,lynx,mongoose,rhinoceros beetle                                            |
| ant,grasshopper,cockroach,cicada                                | bee,cricket,mantis,leafhopper                                                       |
| dragonfly,Angora,hippopotamus,siamang                           | damsel,wood rabbit,llama,gibbon                                                     |
| indri,African elephant,lesser panda,sturgeon                    | Madagascar cat,Indian elephant,giant panda,gar                                      |
| hamper,bicycle-built-for-two,fireboat,cello                     | shopping basket,mountain bike,gondola,violin                                        |
| soup bowl,oxygen mask,china cabinet,Polaroid camera             | mixing bowl,snorkel,medicine chest,reflex camera                                    |
| bottlecap,freight car,swab,fur coat                             | nipple,passenger car,broom,lab coat                                                 |
| shower curtain,computer keyboard,bassoon,cliff dwelling         | theater curtain,joystick,oboe,yurt                                                  |
| loudspeaker,wool,harvester,oil filter                           | microphone,velvet,thresher,strainer                                                 |
| accordion,bookcase,suit,beer glass                              | harmonica,wardrobe,diaper,goblet                                                    |
| vestment,acoustic guitar,barrow,space heater                    | academic gown,electric guitar,shopping cart,stove                                   |
| crash helmet,vase,whiskey jug,cleaver                           | football helmet,beaker,water jug,letter opener                                      |
| candle,airship,combination lock,electric locomotive             | spotlight,balloon,padlock,steam locomotive                                          |
| barometer,stethoscope,binoculars,Dutch oven                     | scale,syringe,projector,rotisserie                                                  |
| frying pan,grand piano,church,swing                             | wok,upright,mosque,teddy                                                            |
| knee pad,crossword puzzle,kimono,catamaran                      | apron,jigsaw puzzle,abaya,trimaran                                                  |
| feather boa,cocktail shaker,holster,apiary                      | stole,saltshaker,scabbard,boathouse                                                 |
| birdhouse,pirate,bobsled,slot                                   | bell cote,wreck,dogsled,vending machine                                             |
| canoe,crutch,pay-phone,cinema                                   | yawl,flagpole,dial telephone,home theater                                           |
| parking meter,moving van,barbell,ice lolly                      | stopwatch,police van,dumbbell,ice cream                                             |
| broccoli,zucchini,acorn squash,orange                           | cauliflower,spaghetti squash,butternut squash,lemon                                 |
| eggnog,alp,lakeside                                             | cup,volcano,seashore                                                                |

Table 3: Class names in train dataset and test dataset splitted from [3].

## References

- [1] Y. Jeong and H. O. Song. Efficient end-to-end learning for quantizable representations. In *ICML*, 2018. 2
- [2] G. OR-tools. <https://developers.google.com/optimization/>, 2018. 2
- [3] O. Russakovsky, J. Deng, H. Su, J. Krause, S. Satheesh, S. Ma, Z. Huang, A. Karpathy, A. Khosla, M. Bernstein, A. C. Berg, and L. Fei-Fei. ImageNet Large Scale Visual Recognition Challenge. *IJCV*, 2015. 3
- [4] K. Sohn. Improved deep metric learning with multi-class n-pair loss objective. In *NIPS*, 2016. 2
